# Supplementary material for: BReast CAncer susceptibility gene 2 deficiency exacerbates oxidized LDL‐induced DNA damage and endothelial apoptosis
Source: PubMed Central journal article supplement (PMC7340845; doi:10.14814/phy2.14481), 2020-07-07
Supplement: PHY2-8-e14481-s001.pdf [file PHY2-8-e14481-s001.pdf]

SUPPLEMENTARY FIGURE 1

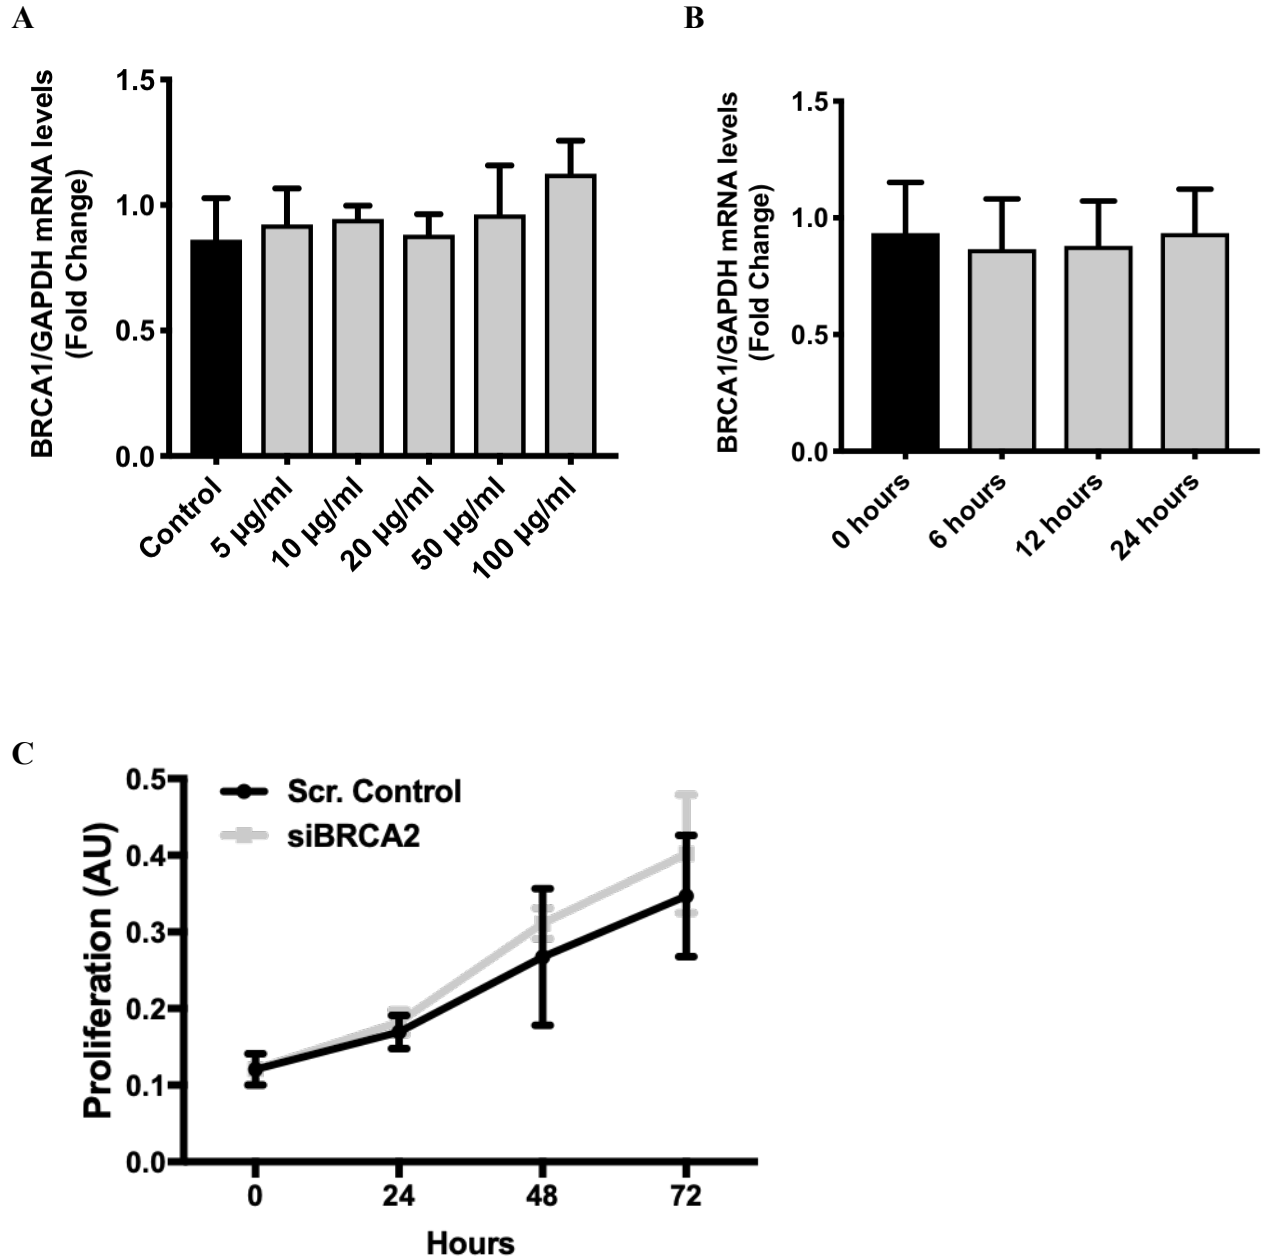

**Supplementary Figure 1.** (A) BRCA1 qPCR performed on RNA isolated from oxLDL (0, 5, 10, 20, 50 and 100 µg/mL for 24 hours)-treated HUVECs. N = 3-4 in triplicate. (B) BRCA1 qPCR performed on RNA isolated from oxLDL (100 µg/mL for 0, 6, 12 and 24 hours)-treated HUVECs. N = 3-4 in triplicate. (C) Proliferation was evaluated in HUVECs transfected either with scrambled control or siBRCA2 for 24, 48 and 72 hours. N = 12.
